# Supplementary material
Source: PubMed Central journal article supplement (PMC4826574)
Supplement: NIHMS773308-supplement-SFs.pdf [file NIHMS773308-supplement-SFs.pdf]

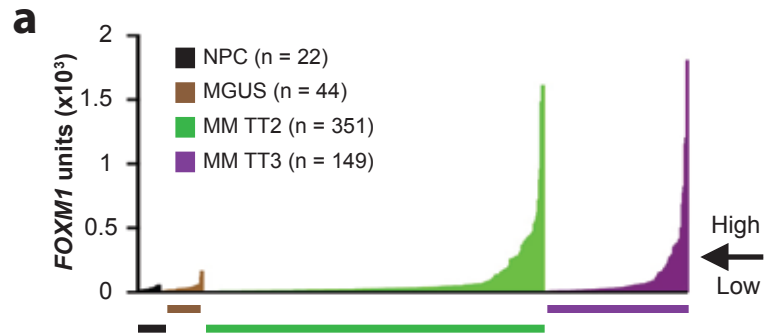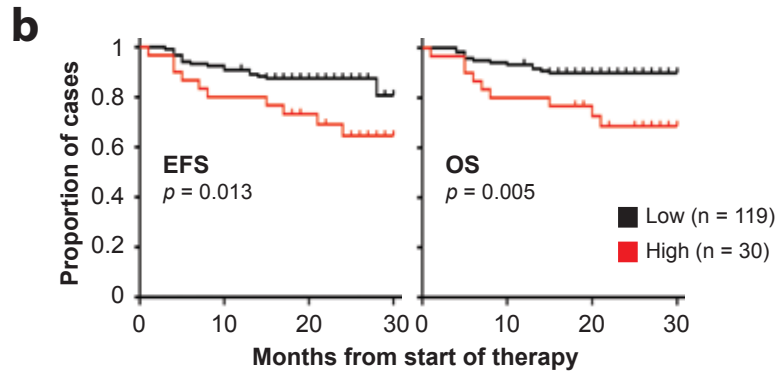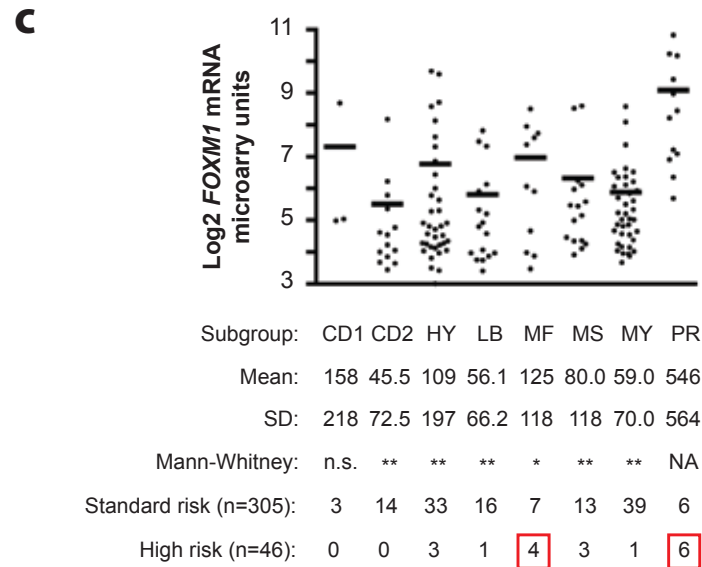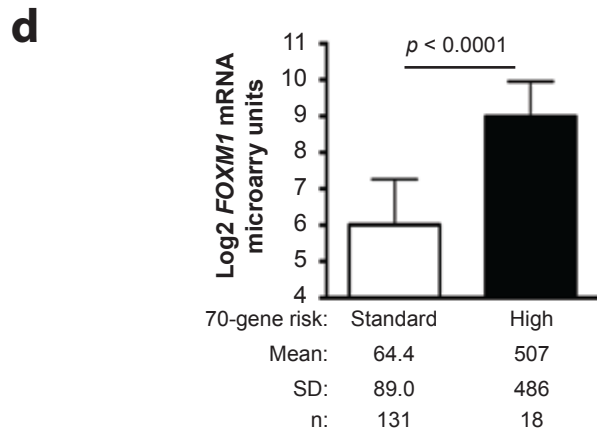

Supplemental Figure 1: Gu *et al.*

University of Heidelberg, Germany  
247 myeloma patients

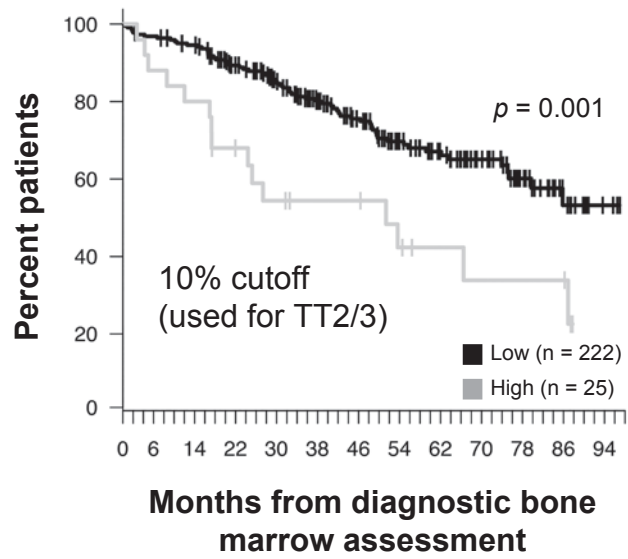

**Case 1**

**Case 2**

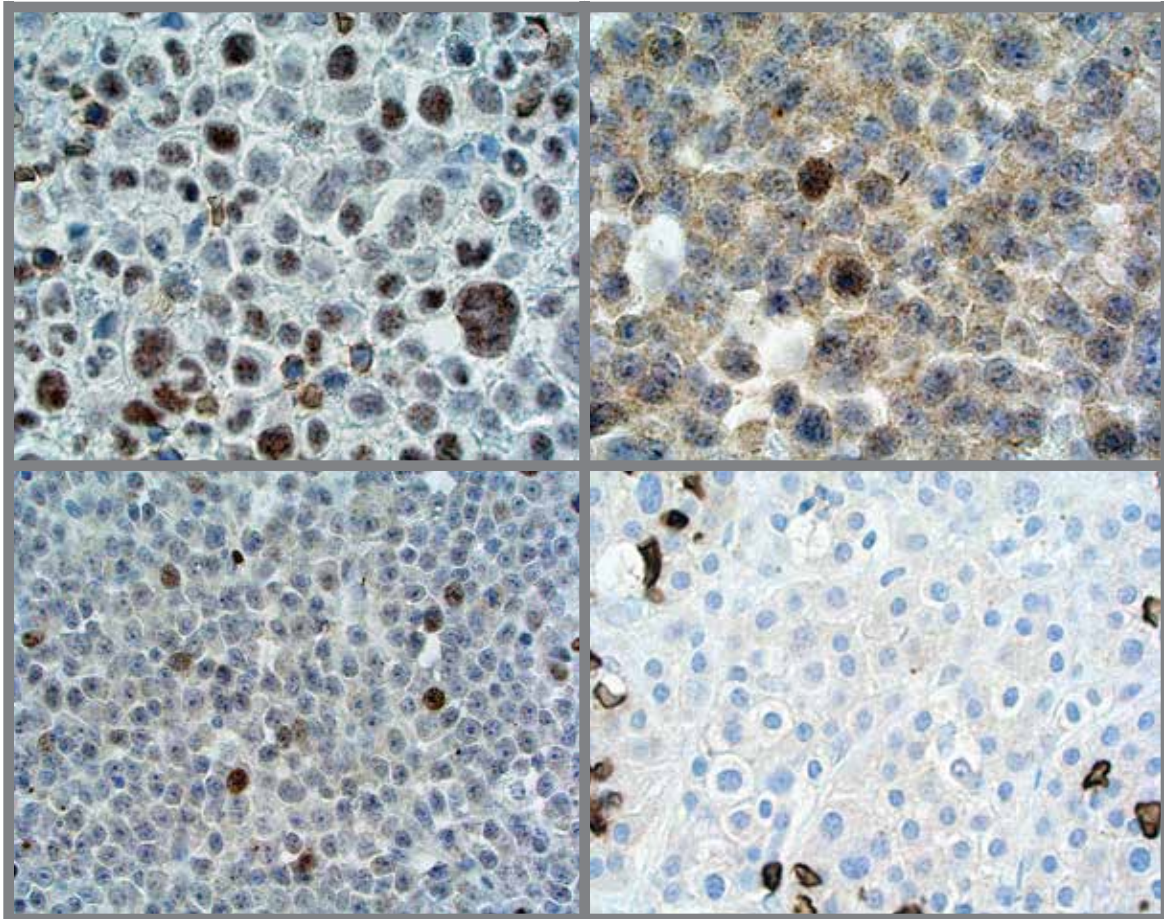

**Case 3**

**Case 4**

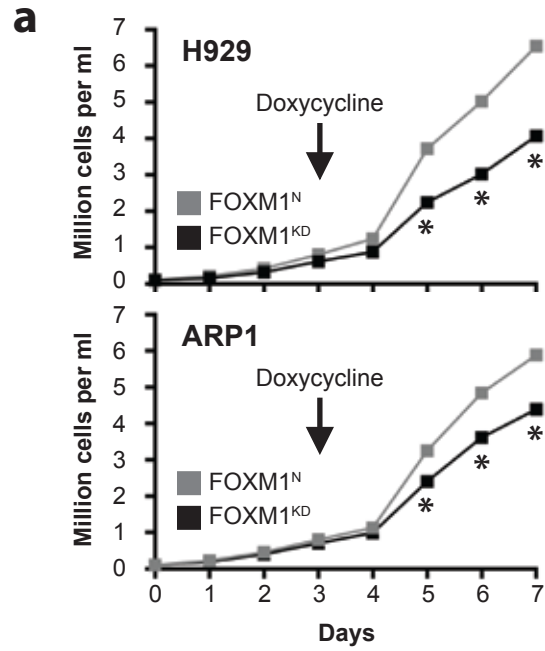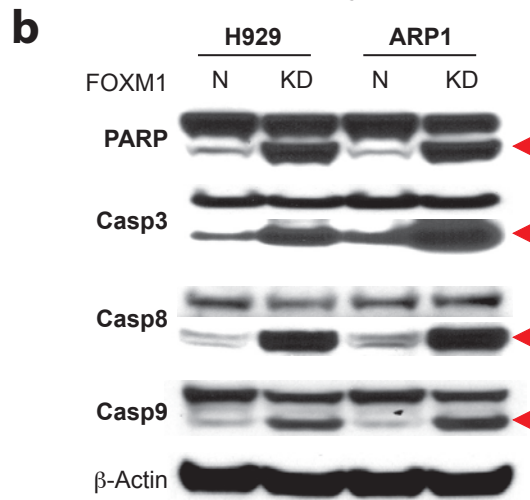

Supplemental Figure 4: Gu *et al.*

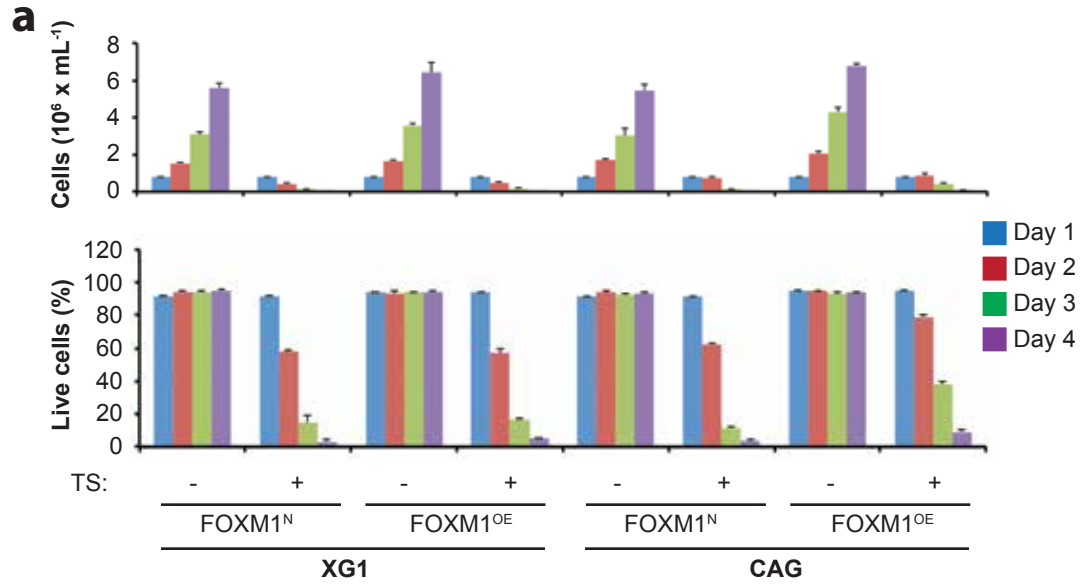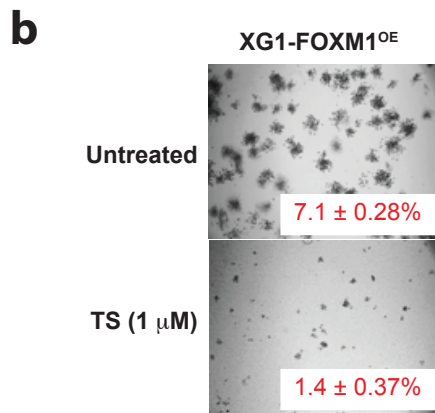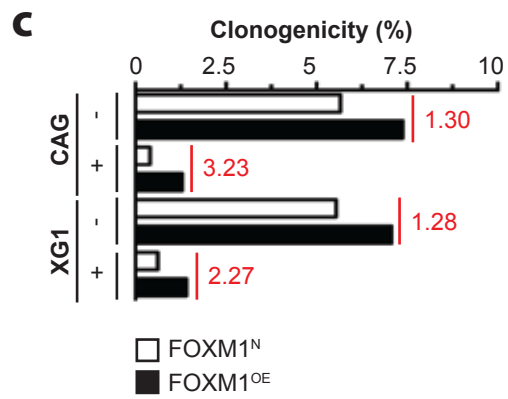

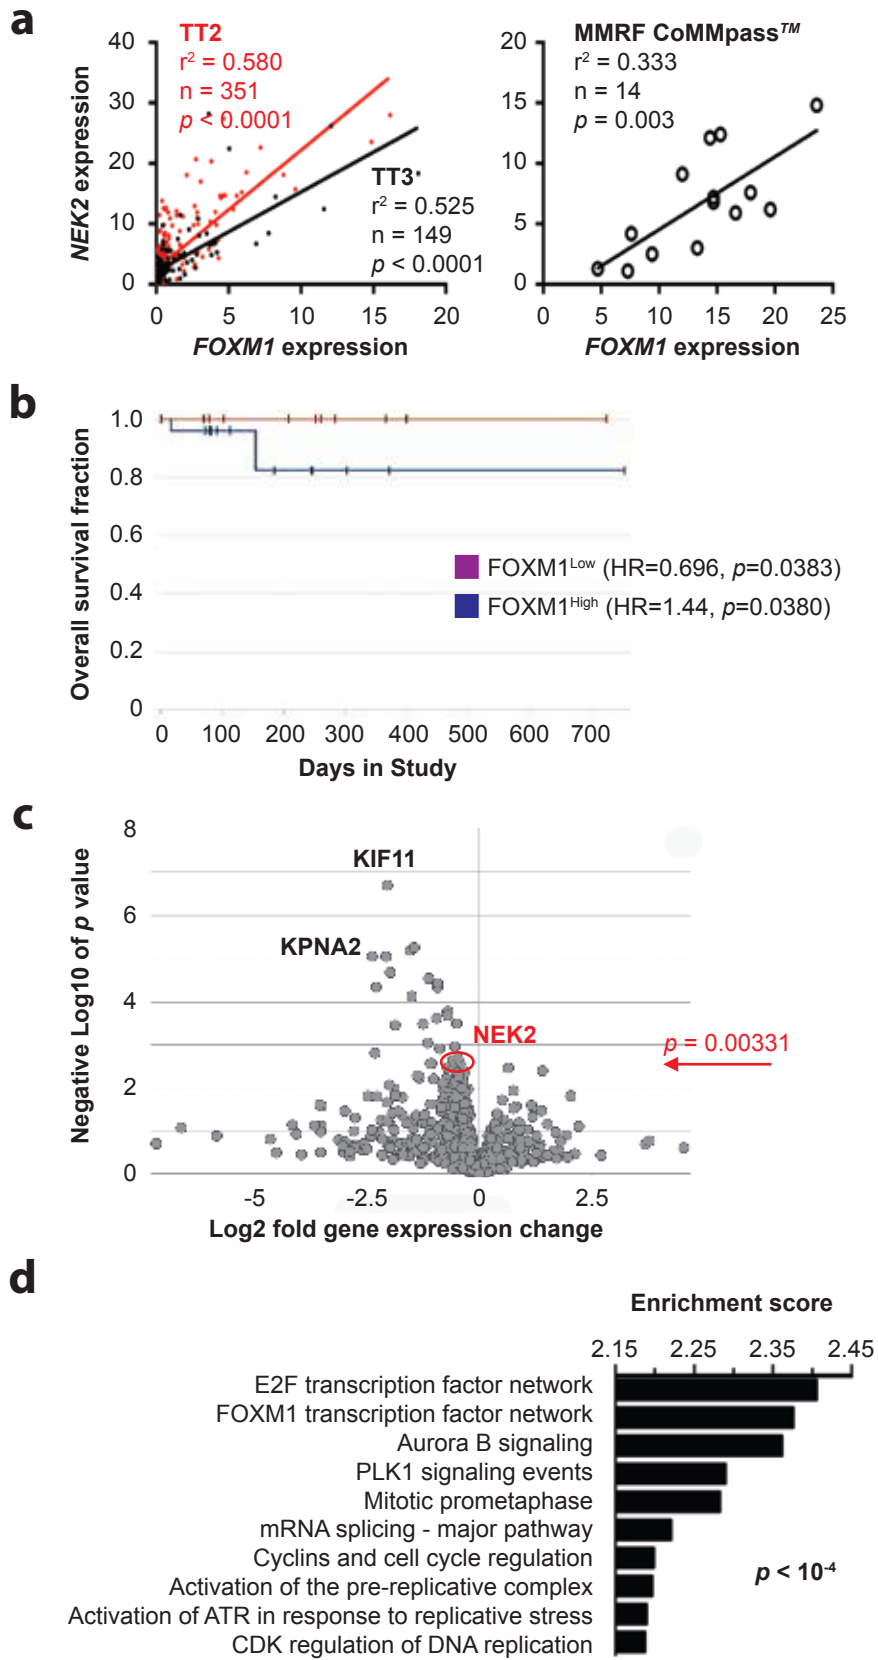

Supplemental Figure 6: Gu *et al.*
